# Supplementary material for: Hyperactivation of the proteasome core particle in Caenorhabditis elegans protects against proteotoxic stress and extends lifespan
Source: Research Square preprint supplement (doi:10.21203/rs.3.rs-960676/v1), 2021-12-10
Supplement: Supplementary file 1 [file 4f8844af09f7ba0d224e5ff5.xlsx]

## Sheet: Sheet1
Protein IDs	Protein names	Gene names	Fasta headers	Reporter intensity 126_WT–1	Reporter intensity 127_WT–2	Reporter intensity 128_WT–3	Reporter intensity 129_α3ΔN–1	Reporter intensity 130_α3ΔN–2	Reporter intensity 131_α3ΔN–3	Normalized of Reporter intensity 126_WT–1	Normalized of Reporter intensity 127_WT–2	Normalized of Reporter intensity 128_WT–3	Normalized of Reporter intensity 129_α3ΔN–1	Normalized of Reporter intensity 130_α3ΔN–2	Normalized of Reporter intensity 131_α3ΔN–3			Fold-change (WT vs α3ΔN)	p-value	DEPs
Q9GZH4	Dolichyl-diphosphooligosaccharide--protein glycosyltransferase subunit 1	ribo-1	sp|Q9GZH4|RPN1_CAEEL Dolichyl-diphosphooligosaccharide--protein glycosyltransferase subunit 1 OS=Caenorhabditis elegans OX=6239 GN=ribo-1 PE=3 SV=2	555130	432170	696690	798450	452220	579620	567724	556371	594541	621437	557974	567041			1.01618	0.705312
Q95Y72	Probable 26S proteasome complex subunit dss-1	dss-1	sp|Q95Y72|DSS1_CAEEL Probable 26S proteasome complex subunit dss-1 OS=Caenorhabditis elegans OX=6239 GN=dss-1 PE=1 SV=2	145550	92829	137150	186040	112840	149530	148852	119507	117041	144796	139228	146285			1.11653	0.224938
O61742		rpn-10	sp|O61742|PSMD4_CAEEL 26S proteasome non-ATPase regulatory subunit 4 OS=Caenorhabditis elegans OX=6239 GN=rpn-10 PE=2 SV=2	80447	54769	80290	102400	62512	79940	82272.1	70509	68517.8	79698.3	77130.8	78205.2			1.06207	0.352497
O76577;P41878;P41883	26S proteasome non-ATPase regulatory subunit 14	rpn-11	sp|O76577|PSDE_CAEEL 26S proteasome non-ATPase regulatory subunit 14 OS=Caenorhabditis elegans OX=6239 GN=rpn-11 PE=1 SV=1	30673	20412	32022	40880	25707	30988	31368.9	26278.2	27326.9	31817.1	31718.7	30315.5			1.10447	0.142885
Q04908	26S proteasome non-ATPase regulatory subunit 3	rpn-3	sp|Q04908|PSMD3_CAEEL 26S proteasome non-ATPase regulatory subunit 3 OS=Caenorhabditis elegans OX=6239 GN=rpn-3 PE=1 SV=1	442180	335170	455140	560680	401890	500650	452212	431494	388407	436379	495874	489785			1.11786	0.134034
Q9GZH5		rpn-1	tr|Q9GZH5|Q9GZH5_CAEEL 26S proteasome non-ATPase regulatory subunit 2 OS=Caenorhabditis elegans OX=6239 GN=rpn-1 PE=1 SV=1	403410	288900	449200	538910	358390	454630	412562	371927	383338	419436	442202	444764			1.11866	0.0335881
Q20938	Probable 26S proteasome regulatory subunit rpn-6.1	rpn-6.1	sp|Q20938|PS11A_CAEEL Probable 26S proteasome regulatory subunit rpn-6.1 OS=Caenorhabditis elegans OX=6239 GN=rpn-6.1 PE=2 SV=2	297180	206690	330980	395550	260160	333800	303922	266091	282452	307858	321000	326556			1.12077	0.0490516
Q18115	26S proteasome non-ATPase regulatory subunit 1	rpn-2	sp|Q18115|PSMD1_CAEEL 26S proteasome non-ATPase regulatory subunit 1 OS=Caenorhabditis elegans OX=6239 GN=rpn-2 PE=3 SV=4	235600	157900	248840	315980	197440	254610	240945	203279	212355	245928	243612	249084			1.12496	0.0754485
Q20585	26S proteasome non-ATPase regulatory subunit 6	rpn-7	sp|Q20585|PSMD6_CAEEL 26S proteasome non-ATPase regulatory subunit 6 OS=Caenorhabditis elegans OX=6239 GN=rpn-7 PE=2 SV=1	353590	245170	382770	474530	308320	397000	361612	315629	326648	369329	380422	388384			1.13373	0.0399853
Q19324		rpn-5	tr|Q19324|Q19324_CAEEL PCI domain-containing protein OS=Caenorhabditis elegans OX=6239 GN=rpn-5 PE=1 SV=1	203330	146540	199050	255220	187570	228660	207943	188654	169865	198639	231434	223698			1.15413	0.120514
Q23449	26S proteasome non-ATPase regulatory subunit 8	rpn-12	sp|Q23449|PSMD8_CAEEL 26S proteasome non-ATPase regulatory subunit 8 OS=Caenorhabditis elegans OX=6239 GN=rpn-12 PE=3 SV=1	119620	83773	124180	160570	107470	135790	122334	107849	105973	124972	132602	132843			1.16142	0.0351989
O61792		rpn-8	tr|O61792|O61792_CAEEL MPN domain-containing protein OS=Caenorhabditis elegans OX=6239 GN=rpn-8 PE=1 SV=1	203090	133750	227660	288110	176460	230010	207697	172188	194280	224237	217726	225018			1.16165	0.0433817
Q22253		rpn-9	tr|Q22253|Q22253_CAEEL 26S proteasome non-ATPase regulatory subunit 13 OS=Caenorhabditis elegans OX=6239 GN=rpn-9 PE=1 SV=1	96009	67643	95601	124220	89204	105550	98187.1	87082.9	81583.9	96680.9	110065	103259			1.1617	0.0820368
Q09289;A0A2K5ATW5	Proteasomal ubiquitin receptor ADRM1 homolog	rnp-13	sp|Q09289|ADRM1_CAEEL Proteasomal ubiquitin receptor ADRM1 homolog OS=Caenorhabditis elegans OX=6239 GN=rpn-13 PE=1 SV=2;tr|A0A2K5ATW5|A0A2K5ATW5_CAEEL RPN13_C domain-containing protein OS=Caenorhabditis elegans OX=6239 GN=rpn-13 PE=1 SV=1	100600	62606	109070	145500	83913	118750	102882	80598.3	93078.1	113243	103537	116173			1.20391	0.0661734
Q10920	Probable 26S proteasome non-ATPase regulatory subunit 9	psmd-9	sp|Q10920|PSMD9_CAEEL Probable 26S proteasome non-ATPase regulatory subunit 9 OS=Caenorhabditis elegans OX=6239 GN=psmd-9 PE=1 SV=2	71949	51491	68232	84295	59797	77031	73581.3	66289	58227.8	65607.1	73780.9	75359.3			1.08405	0.359452
O17071	Probable 26S protease regulatory subunit 10B	rpt-4	sp|O17071|PRS10_CAEEL Probable 26S proteasome regulatory subunit 10B OS=Caenorhabditis elegans OX=6239 GN=rpt-4 PE=1 SV=2	281270	217720	296520	357390	261980	331120	287651	280290	253044	278158	323246	323934			1.12711	0.132365
O76371;A0A177EBM8		rpt-5	sp|O76371|PRS6A_CAEEL 26S protease regulatory subunit 6A OS=Caenorhabditis elegans OX=6239 GN=rpt-5 PE=1 SV=1	302030	218090	282660	356270	282290	327700	308882	280767	241216	277286	348305	320588			1.13879	0.248727
P46502	Probable 26S protease regulatory subunit 6B	rpt-3	sp|P46502|PRS6B_CAEEL Probable 26S proteasome regulatory subunit 6B OS=Caenorhabditis elegans OX=6239 GN=rpt-3 PE=3 SV=1	256420	178880	271610	341430	228220	293120	262237	230288	231786	265736	281591	286759			1.15156	0.0397746
O16368;A0A177EJZ7	Probable 26S protease regulatory subunit 4	rpt-2	sp|O16368|PRS4_CAEEL Probable 26S proteasome regulatory subunit 4 OS=Caenorhabditis elegans OX=6239 GN=rpt-2 PE=3 SV=1	493080	345850	501510	626850	453850	550380	504266	445244	427978	487880	559985	538436			1.15159	0.0914123
Q18787;A0A4R7P231;A0A2S9DG87;A0A2S8ZXF2;A0A2S9ALB6;A0A2S8UVX1;A0A2S8ZB64;A0A2S9A875;A0A2S9BP96;A0A3N1YCG8;A0A4R6DHY1;A0A177EI74;A0A177ECT8;A0A2S9DS28;A0A2S9BZX2;A0A2S9C8F9;A0A2S8VZ73;A0A4V3BLF8;A0A4R7NLS9;A0A2S8WPY2;A0A177EC65;A0A4R6S5C7;A0A2S8WMC3	26S protease regulatory subunit 7	rpt-1	sp|Q18787|PRS7_CAEEL 26S proteasome regulatory subunit 7 OS=Caenorhabditis elegans OX=6239 GN=rpt-1 PE=1 SV=1	449250	296110	444610	600300	385780	489890	459442	381209	379421	467216	475997	479258			1.16589	0.0643913
Q9XTT9;O16299		rpt-6	sp|Q9XTT9|PRS8_CAEEL 26S proteasome regulatory subunit 8 OS=Caenorhabditis elegans OX=6239 GN=rpt-6 PE=1 SV=1	320760	237320	336000	430140	306700	378700	328037	305523	286736	334780	378424	370482			1.17754	0.0387072
Q95005	Proteasome subunit alpha type-7	pas-4	sp|Q95005|PSA7_CAEEL Proteasome subunit alpha type-7 OS=Caenorhabditis elegans OX=6239 GN=pas-4 PE=1 SV=1	348680	233450	353570	447290	311580	401270	356590	300541	301729	348128	384445	392562			1.17341	0.073472
Q09583	Proteasome subunit alpha type-3	pas-7	sp|Q09583|PSA3_CAEEL Proteasome subunit alpha type-3 OS=Caenorhabditis elegans OX=6239 GN=pas-7 PE=1 SV=3	211310	148030	219720	286150	190400	254060	216104	190572	187505	222712	234926	248546			1.1885	0.0335407
Q27488	Proteasome subunit alpha type-2	pas-2	sp|Q27488|PSA2_CAEEL Proteasome subunit alpha type-2 OS=Caenorhabditis elegans OX=6239 GN=pas-2 PE=1 SV=1	96495	71378	97297	111890	104900	113780	98684.1	91891.3	83031.3	87084.4	129431	111311			1.19817	0.239119
Q9N599	Proteasome subunit alpha type-4	pas-3	sp|Q9N599|PSA4_CAEEL Proteasome subunit alpha type-4 OS=Caenorhabditis elegans OX=6239 GN=pas-3 PE=3 SV=2	137470	96703	139930	167940	121120	150870	140589	124494	119413	130708	149445	147596			1.11249	0.174115
O17586	Proteasome subunit alpha type-6	pas-1	sp|O17586|PSA6_CAEEL Proteasome subunit alpha type-6 OS=Caenorhabditis elegans OX=6239 GN=pas-1 PE=1 SV=1	274270	217930	275710	329330	268580	313170	280492	280561	235285	256319	331389	306374			1.12274	0.289841
Q95008	Proteasome subunit alpha type-5	pas-5	sp|Q95008|PSA5_CAEEL Proteasome subunit alpha type-5 OS=Caenorhabditis elegans OX=6239 GN=pas-5 PE=1 SV=1	262000	203110	326070	347270	233020	292110	267944	261482	278261	270282	287513	285771			1.04442	0.17855
O44156	Proteasome subunit alpha type-1	pas-6	sp|O44156|PSA1_CAEEL Proteasome subunit alpha type-1 OS=Caenorhabditis elegans OX=6239 GN=pas-6 PE=1 SV=1	177850	140770	190300	230720	162600	205250	181885	181226	162398	179570	200625	200796			1.10558	0.123757
Q9XUV0	Proteasome subunit beta type	pbs-5	sp|Q9XUV0|PBS5_CAEEL Proteasome subunit pbs-5 OS=Caenorhabditis elegans OX=6239 GN=pbs-5 PE=3 SV=1	101020	81737	112550	125340	95562	114720	103312	105227	96047.9	97552.6	117910	112230			1.07586	0.313024
P34286	Proteasome subunit beta type-1	pbs-6	sp|P34286|PSB1_CAEEL Proteasome subunit beta type-1 OS=Caenorhabditis elegans OX=6239 GN=pbs-6 PE=1 SV=2	102990	80776	112590	129320	99682	115670	105326	103990	96082	100650	122993	113160			1.10283	0.213318
O62102	Proteasome subunit beta type	pbs-2	tr|O62102|O62102_CAEEL Proteasome subunit beta OS=Caenorhabditis elegans OX=6239 GN=pbs-2 PE=1 SV=1	152490	119260	150040	175260	146990	172900	155949	153534	128041	136406	181364	169148			1.11289	0.364819
Q966I8	Proteasome subunit beta type	pbs-1	tr|Q966I8|Q966I8_CAEEL Proteasome subunit beta OS=Caenorhabditis elegans OX=6239 GN=pbs-1 PE=1 SV=2	108740	89048	123170	142140	107430	128120	111207	114639	105111	110628	132553	125340			1.1135	0.149374
P90868		pbs-7	tr|P90868|P90868_CAEEL Proteasome subunit beta OS=Caenorhabditis elegans OX=6239 GN=pbs-7 PE=1 SV=2	113200	87524	128140	138130	110900	136450	115768	112677	109352	107507	136835	133489			1.11851	0.230858
Q23237	Proteasome subunit beta type-3	pbs-3	sp|Q23237|PSB3_CAEEL Proteasome subunit beta type-3 OS=Caenorhabditis elegans OX=6239 GN=pbs-3 PE=1 SV=1	62650	42718	75936	86352	57862	74865	64071.3	54994.7	64802.2	67208.1	71393.4	73240.3			1.15214	0.0617906
P91477	Proteasome subunit beta type-2	pbs-4	sp|P91477|PSB2_CAEEL Proteasome subunit beta type-2 OS=Caenorhabditis elegans OX=6239 GN=pbs-4 PE=3 SV=2	117010	81894	110240	128320	117780	135900	119665	105429	94076.6	99872	145324	132951			1.18478	0.272297
P54811;A0A4R2Y6T9;A0A177EBZ2	Transitional endoplasmic reticulum ATPase homolog 1	cdc-48.1	sp|P54811|TERA1_CAEEL Transitional endoplasmic reticulum ATPase homolog 1 OS=Caenorhabditis elegans OX=6239 GN=cdc-48.1 PE=1 SV=1	755880	578090	779880	963770	749210	881090	773028	744227	665534	750106	924417	861969			1.16204	0.122063
P54812	Transitional endoplasmic reticulum ATPase homolog 2	cdc-48.2	sp|P54812|TERA2_CAEEL Transitional endoplasmic reticulum ATPase homolog 2 OS=Caenorhabditis elegans OX=6239 GN=cdc-48.2 PE=1 SV=2	298820	235270	326150	434140	337710	398010	305599	302884	278330	337893	416685	389372			1.28996	0.0254946	UP
Q21222		cdc-48.3	sp|Q21222|AFG2H_CAEEL ATPase family protein 2 homolog OS=Caenorhabditis elegans OX=6239 GN=cdc-48.3 PE=1 SV=1	40670	27110	42231	50892	31092	39434	41592.7	34901.1	36039.1	39609.4	38363	38578.2			1.0357	0.55878
Q95PZ7			tr|Q95PZ7|Q95PZ7_CAEEL Uncharacterized protein OS=Caenorhabditis elegans OX=6239 GN=CELE_Y66D12A.9 PE=1 SV=1	184240	147900	190850	226700	170640	193080	188420	190405	162867	176441	210545	188890			1.06311	0.441074
N1NTN5;Q17971			tr|N1NTN5|N1NTN5_CAEEL Uncharacterized protein OS=Caenorhabditis elegans OX=6239 GN=C14C10.5 PE=1 SV=1;tr|Q17971|Q17971_CAEEL Uncharacterized protein OS=Caenorhabditis elegans OX=6239 GN=C14C10.5 PE=1 SV=1	237490	167030	232310	324940	214200	266370	242878	215033	198249	252902	264292	260589			1.18536	0.0392984
