# Supplementary material for: Hyperactivation of the proteasome core particle in Caenorhabditis elegans protects against proteotoxic stress and extends lifespan
Source: Research Square preprint supplement (doi:10.21203/rs.3.rs-960676/v1), 2021-12-10
Supplement: Supplementary file 2 [file 9f264297fe5583fb0d87983a.xlsx]

## Sheet: Sheet1
Protein IDs	Gene names	Fasta headers	Reporter intensity 126_WT–1	Reporter intensity 127_WT–2	Reporter intensity 128_WT–3	Reporter intensity 129_α3ΔN–1	Reporter intensity 130_α3ΔN–2	Reporter intensity 131_α3ΔN–3	Normalized of Reporter intensity 126_WT–1	Normalized of Reporter intensity 127_WT–2	Normalized of Reporter intensity 128_WT–3	Normalized of Reporter intensity 129_α3ΔN–1	Normalized of Reporter intensity 130_α3ΔN–2	Normalized of Reporter intensity 131_α3ΔN–3		Fold-change (WT vs α3ΔN)	p-value	DEPs
Q966I7	CELE_K08D12.3	tr|Q966I7|Q966I7_CAEEL CCHC-type domain-containing protein OS=Caenorhabditis elegans OX=6239 GN=CELE_K08D12.3 PE=1 SV=1	197900	121330	149640	64983	44116	51100	202390	156199	127700	50576.5	54432.8	49991		0.318742	0.00716	DOWN
P02513;P06581	hsp-16.48;hsp-16.41	sp|P02513|HSP17_CAEEL Heat shock protein Hsp-16.48/Hsp-16.49 OS=Caenorhabditis elegans OX=6239 GN=hsp-16.48 PE=2 SV=1;sp|P06581|HSP16_CAEEL Heat shock protein Hsp-16.41 OS=Caenorhabditis elegans OX=6239 GN=hsp-16.41 PE=2 SV=1	42321	54969	105450	29189	21142	24742	43281.1	70766.5	89988.9	22717.9	26086.2	24205.1		0.357824	0.0324599	DOWN
P34696;Q21062;V6CLQ2;P06582	hsp-16.1;hsp-16.2	sp|P34696|HSP11_CAEEL Heat shock protein Hsp-16.1/Hsp-16.11 OS=Caenorhabditis elegans OX=6239 GN=hsp-16.1 PE=2 SV=1;tr|Q21062|Q21062_CAEEL Heat shock protein 16-1 OS=Caenorhabditis elegans OX=6239 PE=3 SV=1;tr|V6CLQ2|V6CLQ2_CAEEL SHSP domain-containing pro	67610	77357	136450	46250	34640	42735	69143.8	99588.6	116444	35996.6	42740.8	41807.6		0.422703	0.0172537	DOWN
O45166	folt-2	sp|O45166|FOLT2_CAEEL Folate-like transporter 2 OS=Caenorhabditis elegans OX=6239 GN=folt-2 PE=3 SV=1	43950	50064	67713	29736	24566	27849	44947.1	64451.9	57784.9	23143.6	30310.9	27244.6		0.482697	0.00907215	DOWN
P34654	ZK632.9	sp|P34654|YOT9_CAEEL Uncharacterized protein ZK632.9 OS=Caenorhabditis elegans OX=6239 GN=ZK632.9 PE=4 SV=3	66701	60962	67214	36131	31213	32732	68214.2	78481.9	57359	28120.9	38512.3	32021.7		0.483472	0.00670207	DOWN
G5EEV5	pud-3	tr|G5EEV5|G5EEV5_CAEEL 5C820 OS=Caenorhabditis elegans OX=6239 GN=pud-3 PE=1 SV=1	218560	231660	348710	194860	108220	129660	223518	298237	297582	151660	133528	126846		0.502887	0.00631599	DOWN
G5EBF3	pud-2.1	tr|G5EBF3|G5EBF3_CAEEL Protein Up-regulated in Daf-2(Gf) OS=Caenorhabditis elegans OX=6239 GN=pud-2.1 PE=1 SV=1	646860	624410	934530	647930	292570	379390	661535	803859	797509	504286	360989	371157		0.546392	0.00639935	DOWN
O17621;A0A0K3AWA7	C29F7.2	tr|O17621|O17621_CAEEL CHK domain-containing protein OS=Caenorhabditis elegans OX=6239 GN=C29F7.2 PE=1 SV=2;tr|A0A0K3AWA7|A0A0K3AWA7_CAEEL CHK domain-containing protein OS=Caenorhabditis elegans OX=6239 GN=C29F7.2 PE=1 SV=1	224500	194530	270380	162080	111240	132740	229593	250436	230737	126147	137254	129859		0.553292	0.000147263	DOWN
Q7JP52;Q20660	hsp-17	tr|Q7JP52|Q7JP52_CAEEL SHSP domain-containing protein OS=Caenorhabditis elegans OX=6239 GN=hsp-17 PE=1 SV=1;tr|Q20660|Q20660_CAEEL SHSP domain-containing protein OS=Caenorhabditis elegans OX=6239 GN=hsp-17 PE=1 SV=1	199210	179150	283480	159490	101800	128370	203729	230636	241916	124132	125607	125584		0.55498	0.000900691	DOWN
Q9XX57;D4YWC3	dct-16	tr|Q9XX57|Q9XX57_CAEEL DAF-16/FOXO Controlled, germline Tumor affecting OS=Caenorhabditis elegans OX=6239 GN=dct-16 PE=1 SV=1;tr|D4YWC3|D4YWC3_CAEEL DAF-16/FOXO Controlled, germline Tumor affecting OS=Caenorhabditis elegans OX=6239 GN=dct-16 PE=1 SV=1	268890	251650	353450	213020	137220	176240	274990	323972	301627	165794	169310	172415		0.563542	0.000784855	DOWN
Q20507	acbp-3	sp|Q20507|ACBP3_CAEEL Acyl-CoA-binding protein homolog 3 OS=Caenorhabditis elegans OX=6239 GN=acbp-3 PE=3 SV=2	71946	57151	94034	55919	35205	43828	73578.2	73575.6	80246.7	43522	43437.9	42876.9		0.570961	0.000129151	DOWN
O62277	dct-18	tr|O62277|O62277_CAEEL DAF-16/FOXO Controlled, germline Tumor affecting OS=Caenorhabditis elegans OX=6239 GN=dct-18 PE=1 SV=1	202220	208080	308510	158350	125970	147670	206808	267880	263276	123244	155429	144465		0.573387	0.00854685	DOWN
Q18158	swm-1	sp|Q18158|SWM1_CAEEL Serine protease inhibitor swm-1 OS=Caenorhabditis elegans OX=6239 GN=swm-1 PE=1 SV=1	47714	43743	55736	47061	20853	27615	48796.5	56314.3	47564	36627.8	25729.6	27015.7		0.585382	0.00862997	DOWN
M1ZJ62;M1ZMJ3	pud-4	tr|M1ZJ62|M1ZJ62_CAEEL PUD1_2 domain-containing protein OS=Caenorhabditis elegans OX=6239 GN=pud-4 PE=1 SV=1;tr|M1ZMJ3|M1ZMJ3_CAEEL PUD1_2 domain-containing protein OS=Caenorhabditis elegans OX=6239 GN=pud-4 PE=1 SV=1	91991	101210	122090	87735	53569	61237	94078	130297	104189	68284.5	66096.4	59908		0.591328	0.0155991	DOWN
G5EBV4	lec-10	tr|G5EBV4|G5EBV4_CAEEL Galectin OS=Caenorhabditis elegans OX=6239 GN=lec-10 PE=1 SV=1	80056	74532	99487	61878	48080	54487	81872.2	95951.7	84900.2	48159.9	59323.8	53304.5		0.612004	0.00316783	DOWN
O02089	msra-1	tr|O02089|O02089_CAEEL Peptide-methionine (S)-S-oxide reductase OS=Caenorhabditis elegans OX=6239 GN=msra-1 PE=1 SV=1	216490	189350	352140	223080	115250	156610	221401	243767	300509	173624	142202	153211		0.612578	0.0173726	DOWN
Q20753	CELE_F54C9.3	tr|Q20753|Q20753_CAEEL Uncharacterized protein OS=Caenorhabditis elegans OX=6239 GN=CELE_F54C9.3 PE=1 SV=1	114370	94991	158070	104860	60132	76267	116965	122290	134894	81612.9	74194.2	74611.9		0.615849	0.00119919	DOWN
Q10941;A0A2K5ATY0	ugt-46	sp|Q10941|UGT46_CAEEL Putative UDP-glucuronosyltransferase ugt-46 OS=Caenorhabditis elegans OX=6239 GN=ugt-46 PE=1 SV=1;tr|A0A2K5ATY0|A0A2K5ATY0_CAEEL Glucuronosyltransferase OS=Caenorhabditis elegans OX=6239 GN=ugt-46 PE=1 SV=1	205880	158130	246110	168570	104480	129340	210551	203575	210025	131199	128913	126533		0.619474	7.10328e-06	DOWN
Q965Z4;Q09946	CELE_ZK105.1	tr|Q965Z4|Q965Z4_CAEEL DUF19 domain-containing protein OS=Caenorhabditis elegans OX=6239 GN=CELE_ZK105.1 PE=1 SV=1	69485	58040	87101	61123	37514	43929	71061.4	74720.1	74330.2	47572.3	46286.9	42975.7		0.621661	0.000101948	DOWN
Q09359;A0A7I9BCB0	ZK1307.1	sp|Q09359|YS11_CAEEL Uncharacterized protein ZK1307.1 OS=Caenorhabditis elegans OX=6239 GN=ZK1307.1 PE=4 SV=1;tr|A0A7I9BCB0|A0A7I9BCB0_CAEEL Uncharacterized protein OS=Caenorhabditis elegans OX=6239 GN=ZK1307.1 PE=4 SV=1	133180	126970	237580	150830	78927	102940	136201	163460	202746	117392	97384.5	100706		0.627941	0.0372155	DOWN
Q9U3R0;O45941	C08F11.12;Y45F10C.2	sp|Q9U3R0|U375B_CAEEL UPF0375 protein C08F11.12 OS=Caenorhabditis elegans OX=6239 GN=C08F11.12 PE=3 SV=1;sp|O45941|U375E_CAEEL UPF0375 protein Y45F10C.2 OS=Caenorhabditis elegans OX=6239 GN=Y45F10C.2 PE=1 SV=1	305810	183590	288890	228750	124230	174670	312748	236352	246533	178037	153282	170879		0.631194	0.0174805	DOWN
Q23660	CELE_ZK899.2	tr|Q23660|Q23660_CAEEL Uncharacterized protein OS=Caenorhabditis elegans OX=6239 GN=CELE_ZK899.2 PE=1 SV=2	25849	23761	36707	25806	14268	18762	26435.4	30589.7	31325	20084.9	17604.7	18354.8		0.634345	0.00311162	DOWN
Q27GQ5;Q20584;Q27GQ6	CELE_F49C12.7	tr|Q27GQ5|Q27GQ5_CAEEL CHK domain-containing protein OS=Caenorhabditis elegans OX=6239 GN=CELE_F49C12.7 PE=1 SV=1;tr|Q20584|Q20584_CAEEL CHK domain-containing protein OS=Caenorhabditis elegans OX=6239 GN=CELE_F49C12.7 PE=1 SV=1;tr|Q27GQ6|Q27GQ6_CAEEL CHK d	27147	26337	49003	30049	17320	21808	27762.9	33906	41818.2	23387.3	21370.4	21334.7		0.638654	0.039074	DOWN
Q9NEZ8	ech-7	tr|Q9NEZ8|Q9NEZ8_CAEEL Enoyl-CoA Hydratase OS=Caenorhabditis elegans OX=6239 GN=ech-7 PE=1 SV=1	21115	16825	24624	17216	11605	13755	21594	21660.3	21013.6	13399.3	14318.9	13456.5		0.640672	2.8757e-05	DOWN
P34712	pgp-1	sp|P34712|PGP1_CAEEL Multidrug resistance protein pgp-1 OS=Caenorhabditis elegans OX=6239 GN=pgp-1 PE=1 SV=2	34833	34331	45704	30054	21513	26917	35623.2	44197.4	39002.9	23391.1	26543.9	26332.9		0.641859	0.00622459	DOWN
P91532	CELE_W09C3.7	tr|P91532|P91532_CAEEL Uncharacterized protein OS=Caenorhabditis elegans OX=6239 GN=CELE_W09C3.7 PE=1 SV=1	68938	63031	96638	61278	41326	53746	70502	81145.5	82468.9	47692.9	50990.3	52579.6		0.646101	0.00242182	DOWN
Q22814	gst-13	tr|Q22814|Q22814_CAEEL Glutathione S-Transferase OS=Caenorhabditis elegans OX=6239 GN=gst-13 PE=1 SV=1	28315	22225	41784	27775	14632	21507	28957.4	28612.2	35657.6	21617.4	18053.8	21040.3		0.65122	0.0130691	DOWN
Q18577;REV__Q22670	C42D4.1	tr|Q18577|Q18577_CAEEL DUF148 domain-containing protein OS=Caenorhabditis elegans OX=6239 GN=C42D4.1 PE=1 SV=1	617910	465340	728250	550600	312230	401860	631928	599074	621474	428534	385247	393139		0.651517	0.000197842	DOWN
G5EF01	tbb-6	tr|G5EF01|G5EF01_CAEEL Tubulin beta chain OS=Caenorhabditis elegans OX=6239 GN=tbb-6 PE=1 SV=1	330210	241320	340630	251460	171300	210800	337701	310673	290687	195712	211359	206225		0.653096	0.00164782	DOWN
Q93694	gst-24	tr|Q93694|Q93694_CAEEL Glutathione S-Transferase OS=Caenorhabditis elegans OX=6239 GN=gst-24 PE=1 SV=2	247130	242520	396680	256080	161260	197560	252737	312218	338519	199308	198972	193273		0.654754	0.0150288	DOWN
O45346	osm-11	tr|O45346|O45346_CAEEL Uncharacterized protein OS=Caenorhabditis elegans OX=6239 GN=osm-11 PE=1 SV=1	90585	81141	92023	73411	51730	61758	92640.1	104460	78530.5	57136.1	63827.4	60417.7		0.658059	0.0153608	DOWN
P55155	vit-1	sp|P55155|VIT1_CAEEL Vitellogenin-1 OS=Caenorhabditis elegans OX=6239 GN=vit-1 PE=1 SV=2	1722600	1398800	2294500	1657900	957870	1234600	1.76168e+06	1.8008e+06	1.95808e+06	1.29035e+06	1.18187e+06	1.20781e+06		0.666605	0.000852569	DOWN
O62220	F33H2.3	sp|O62220|AN321_CAEEL Acidic leucine-rich nuclear phosphoprotein 32-related protein 1 OS=Caenorhabditis elegans OX=6239 GN=F33H2.3 PE=3 SV=1	9415.6	4730.2	7693.1	12835	9438.4	12293	9629.21	6089.61	6565.13	9989.53	11645.6	12026.2		1.51057	0.0407922	UP
Q19480;B5U8N0	far-5	tr|Q19480|Q19480_CAEEL Fatty Acid/Retinol binding protein OS=Caenorhabditis elegans OX=6239 GN=far-5 PE=1 SV=2;tr|B5U8N0|B5U8N0_CAEEL Fatty Acid/Retinol binding protein OS=Caenorhabditis elegans OX=6239 GN=far-5 PE=1 SV=1	95479	76646	105410	187730	114860	151060	97645.1	98673.3	89954.7	146111	141721	147782		1.52167	0.00011142	UP
Q17898;Q17900	C10C5.3	tr|Q17898|Q17898_CAEEL N-acyl-L-amino-acid amidohydrolase OS=Caenorhabditis elegans OX=6239 GN=C10C5.3 PE=1 SV=1	28955	25932	34902	58007	45309	50523	29611.9	33384.6	29784.7	45147.1	55904.8	49426.6		1.62186	0.00461177	UP
Q23258	CELE_ZC373.2	tr|Q23258|Q23258_CAEEL Uncharacterized protein OS=Caenorhabditis elegans OX=6239 GN=CELE_ZC373.2 PE=1 SV=2	206330	190890	236810	422450	304640	377250	211011	245750	202089	328794	375882	369063		1.62972	0.00222267	UP
P91982	C50B6.7	tr|P91982|P91982_CAEEL Alpha-amylase OS=Caenorhabditis elegans OX=6239 GN=C50B6.7 PE=1 SV=1	5928.5	5501.2	7841.9	15985	7857.3	10662	6063	7082.19	6692.12	12441.2	9694.77	10430.6		1.64168	0.00827188	UP
Q10131	cex-1	sp|Q10131|CEX1_CAEEL Calexcitin-1 OS=Caenorhabditis elegans OX=6239 GN=cex-1 PE=4 SV=1	23829	21190	30199	50236	39489	41367	24369.6	27279.8	25771.2	39098.9	48723.7	40469.3		1.65708	0.00556968	UP
Q23384	nit-1	tr|Q23384|Q23384_CAEEL CN hydrolase domain-containing protein OS=Caenorhabditis elegans OX=6239 GN=nit-1 PE=1 SV=1	22067	24129	34468	54615	39402	48529	22567.6	31063.4	29414.3	42507.1	48616.4	47475.8		1.66896	0.00446479	UP
Q9GUF2	acp-6	tr|Q9GUF2|Q9GUF2_CAEEL ACid Phosphatase family OS=Caenorhabditis elegans OX=6239 GN=acp-6 PE=1 SV=2	320040	279780	410360	837400	447940	587010	327301	360186	350193	651752	552693	574271		1.71413	0.00144761	UP
O45599	cbd-1	sp|O45599|CBD1_CAEEL Chitin-binding domain protein cbd-1 OS=Caenorhabditis elegans OX=6239 GN=cbd-1 PE=3 SV=2	48910	30188	59654	78693	76563	97058	50019.6	38863.7	50907.5	61247.1	94467.7	94951.7		1.79315	0.0351956	UP
Q6AW11	spp-23	tr|Q6AW11|Q6AW11_CAEEL Saposin B-type domain-containing protein OS=Caenorhabditis elegans OX=6239 GN=spp-23 PE=1 SV=1	31346	26820	39875	62774	52530	68889	32057.1	34527.8	34028.5	48857.3	64814.4	67394		1.79962	0.0101266	UP
A5HU97;A0A0S4XR99	CELE_T28A11.2	tr|A5HU97|A5HU97_CAEEL DUF19 domain-containing protein OS=Caenorhabditis elegans OX=6239 GN=CELE_T28A11.2 PE=1 SV=1	149040	108690	152000	370300	193610	262210	152421	139926	129714	288206	238887	256520		1.85663	0.00160632	UP
Q9XVH1	ssp-37	tr|Q9XVH1|Q9XVH1_CAEEL MSP domain-containing protein OS=Caenorhabditis elegans OX=6239 GN=ssp-37 PE=1 SV=1	23193	26212	35467	70813	46285	60452	23719.2	33745.1	30266.8	55114	57109	59140.1		1.95328	0.000911725	UP
Q9GYT3	CELE_F35F10.1	tr|Q9GYT3|Q9GYT3_CAEEL PAW domain-containing protein OS=Caenorhabditis elegans OX=6239 GN=CELE_F35F10.1 PE=1 SV=3	35976	40886	53420	118790	70583	88572	36792.2	52636.2	45587.5	92454.7	87089.2	86649.8		1.97157	0.000905406	UP
Q09486	C30G12.2	tr|Q09486|Q09486_CAEEL Uncharacterized protein OS=Caenorhabditis elegans OX=6239 GN=C30G12.2 PE=1 SV=3	69868	53140	82270	165400	117150	154400	71453.1	68411.9	70207.5	128731	144546	151049		2.01991	0.000434984	UP
G5EDY3	skr-7	tr|G5EDY3|G5EDY3_CAEEL Skp1-related protein OS=Caenorhabditis elegans OX=6239 GN=skr-7 PE=1 SV=1	16878	9764.7	14273	30839	27245	34440	17260.9	12571	12180.3	24002.1	33616.4	33692.6		2.17344	0.0103804	UP
P91017	hpo-32	tr|P91017|P91017_CAEEL Uncharacterized protein OS=Caenorhabditis elegans OX=6239 GN=hpo-32 PE=1 SV=1	16115	11750	19170	55590	34559	28817	16480.6	15126.8	16359.3	43265.9	42640.8	28191.6		2.3787	0.0111624	UP
Q9NAP0	clec-190	tr|Q9NAP0|Q9NAP0_CAEEL C-type LECtin OS=Caenorhabditis elegans OX=6239 GN=clec-190 PE=1 SV=1	119100	110970	155090	585560	264340	363040	121802	142862	132351	455744	326157	355161		2.86403	0.00342422	UP
Q9UAZ2	CELE_Y49G5A.1	tr|Q9UAZ2|Q9UAZ2_CAEEL BPTI/Kunitz inhibitor domain-containing protein OS=Caenorhabditis elegans OX=6239 GN=CELE_Y49G5A.1 PE=1 SV=1	22267	19174	25587	108960	61871	76235	22772.2	24684.4	21835.4	84804	76339.9	74580.6		3.4019	7.03643e-05	UP
